# Supplementary material
Source: publisher figshare collection journal article supplement (https://tandf.figshare.com/articles/dataset/_/28057256)
Supplement: Supplementary file 3 [file 2]

# Supplementary Material and Reproducibility Instructions

## Overview

This repository contains supplementary material for the paper “Estimation and Variable Selection for Interval-censored Failure Time Data with Random Change Point and Application to Breast Cancer Study”, including simulation results, data analysis, and all necessary code to replicate key findings.

## Contents

### 1. Supplementary Material PDF

The **Supplementary Material PDF** contains:

- Four tables and one figure summarizing the results from the simulation study described in the main paper.

### 2. Reproducibility Materials

The **reproducibility\_\_materials.zip** file provides:

- The code for replicating the simulation tables and figures in Section 5.
- The code and scripts for reproducing the SEER breast cancer data analysis results in Section 6.

## Instructions for Use

1. **Download** the **reproducibility\_materials.zip** file.
2. **Extract** the contents of the zip file to your preferred directory.
3. Follow the instructions in the README file within the extracted folder for specific steps to execute each part of the analysis.

For any questions regarding usage, please contact the corresponding author.
