# Supplementary material
Source: publisher figshare collection journal article supplement (https://tandf.figshare.com/articles/dataset/_/28057256)
Supplement: Supplementary file 4 [file 2]

This form documents the artifacts associated with the article (i.e., the data and code supporting the computational findings) and describes how to reproduce the findings.

## Part 1: Data

- ☐ This paper does not involve analysis of external data (i.e., no data are used or the only data are generated by the authors via simulation in their code).
- ☒ I certify that the author(s) of the manuscript have legitimate access to and permission to use the data used in this manuscript.

### Abstract

This SEER breast cancer dataset was obtained from the 2017 November update of the SEER Program of the NCI, which provides information on population-based cancer statistics. The dataset involves female patients with infiltrating duct and lobular carcinoma breast cancer (SEER primary cites recode NOS histology codes 8522/3) diagnosed in 2006-2010. The observation on the survival time has been formatted into the needed interval-censored data. The patients with unknown tumor size, examined regional LNs, regional positive LNs, and the patients whose survival months were less than 1 month were excluded; thus 4024 patients were ultimately included.

### Availability

- ☒ Data **are** publicly available.
- ☐ Data **cannot be made** publicly available.

If the data are publicly available, see the *Publicly available data* section. Otherwise, see the *Non-publicly available data* section, below.

#### Publicly available data

- ☐ Data are available online at:
- ☐ Data are available as part of the paper's supplementary material.
- ☒ Data are publicly available by request, following the process described here:

The dataset is available through an Internet connection or a DVD. To access the SEER data, interested users are required to sign a SEER Research Data Agreement form (available at <https://seer.cancer.gov/data/sample-dua.html>) and then submit a formal request for access to the data. More details about where to access to the SEER data can be found on the website <https://seer.cancer.gov/data/access.html>.

- ☐ Data are or will be made available through some other mechanism, described here:

#### Non-publicly available data

### Description

#### File format(s)

- ☐ CSV or other plain text.
- ☒ Software-specific binary format (.Rda, Python pickle, etc.): .mat
- ☐ Standardized binary format (e.g., netCDF, HDF5, etc.):
- ☐ Other (please specify):

## Data dictionary

- ☒ Provided by authors in the following file(s): README.pdf
- ☐ Data file(s) is(are) self-describing (e.g., netCDF files)
- ☐ Available at the following URL:

## Additional Information (optional)

# Part 2: Code

## Abstract

This code provides a MATLAB implementation for the estimation and variable selection of interval-censored failure time data with a random change point, along with an application to the SEER breast cancer study. The MATLAB scripts are designed to replicate the analyses, plots, and tables presented in the paper.

## Description

### Code format(s)

- ☒ Script files
  - ☐ R
  - ☐ Python
  - ☒ Matlab
  - ☐ Other:
- ☐ Package
  - ☐ R
  - ☐ Python
  - ☐ MATLAB toolbox
  - ☐ Other:
- ☐ Reproducible report
  - ☐ R Markdown
  - ☐ Jupyter notebook
  - ☐ Other:
- ☐ Shell script
- ☐ Other (please specify):

## Supporting software requirements

**Version of primary software used** MATLAB R2017b; MATLAB R2022b

**Libraries and dependencies used by the code** Not Applicable

## Supporting system/hardware requirements (optional)

### Parallelization used

- ☐ No parallel code used
- ☒ Multi-core parallelization on a single machine/node
  - Number of cores used: 12
- ☐ Multi-machine/multi-node parallelization
  - Number of nodes and cores used:

## License

- ☒ MIT License (default)
- ☐ BSD

- ☐ GPL v3.0
- ☐ Creative Commons
- ☐ Other: (please specify)

**Additional information (optional)**

## Part 3: Reproducibility workflow

### Scope

The provided workflow reproduces:

- ☒ Any numbers provided in text in the paper
- ☒ The computational method(s) presented in the paper (i.e., code is provided that implements the method(s))
- ☒ All tables and figures in the paper
- ☐ Selected tables and figures in the paper, as explained and justified below:

### Workflow

#### Location

The workflow is available:

- ☒ As part of the paper's supplementary material.
- ☐ In this Git repository:
- ☐ Other (please specify):

#### Format(s)

- ☐ Single master code file
- ☐ Wrapper (shell) script(s)
- ☐ Self-contained R Markdown file, Jupyter notebook, or other literate programming approach
- ☒ Text file (e.g., a readme-style file) that documents workflow
- ☐ Makefile
- ☐ Other (more detail in *Instructions* below)

### Instructions

The main code is located in the `IC_RandomChangePoint` folder, which includes the `IC_Functions` subdirectory and the primary functions needed to replicate the simulation tables and figures in Section 5 as well as the SEER breast cancer data analysis in Section 6 of the paper "Estimation and Variable Selection for Interval-censored Failure Time Data with Random Change Point and Application to Breast Cancer Study". For different specified transformation models, adjust the `Gx.m` function accordingly. For further details and reproduction instructions, please refer to the `README` file.

### Expected run-time

Approximate time needed to reproduce all analyses on a standard desktop machine:

- ☐ < 1 minute
- ☐ 1-10 minutes
- ☐ 10-60 minutes
- ☒ 1-8 hours
- ☐ > 8 hours
- ☐ Not feasible to run on a desktop machine, as described here:

Additional information (optional)

Notes (optional)
